# Supplementary material for: Consistent responses of vegetation gas exchange to elevated atmospheric CO 2 emerge from heuristic and optimization models
Source: Copernicus journal article supplement (doi:10.5194/bg-19-4387-2022), 2022-09-14
Supplement: Supplementary file 1 [file bg-19-4387-2022-supplement.zip]

Archive with 2 entries (2 files):
- Supplementary data.xlsx
- bg-19-4387-2022-supplement-title-page.pdf
