# Supplementary material for: Consistent responses of vegetation gas exchange to elevated atmospheric CO 2 emerge from heuristic and optimization models
Source: Copernicus journal article supplement (doi:10.5194/bg-19-4387-2022), 2022-09-14
Supplement: Supplementary file 1 [file bg-19-4387-2022-supplement.zip › bg-19-4387-2022-supplement-title-page.pdf]

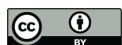

*Supplement of*

## **Consistent responses of vegetation gas exchange to elevated atmospheric CO<sub>2</sub> emerge from heuristic and optimization models**

**Stefano Manzoni et al.**

*Correspondence to:* Stefano Manzoni ([stefano.manzoni@natgeo.su.se](mailto:stefano.manzoni@natgeo.su.se))

- [bg-19-4387-2022-supplement-title-page.pdf](#)
- [Supplementary data.xlsx](#)

The copyright of individual parts of the supplement might differ from the article licence.
